# Supplementary material for: Machine-learning-assisted discovery of perovskite materials with high dielectric breakdown strength
Source: Royal Society of Chemistry journal article supplement (doi:10.1039/d2ma00839d), 2022-01-01
Supplement: d2ma00839d1.pdf [file d2ma00839d1.pdf]

ARTICLE

Supporting information for

**Machine-learning-assisted discovery of perovskite materials with high dielectric breakdown strength**

Jianbo Li<sup>a</sup>, Yuzhong Peng<sup>b</sup>, Lupeng Zhao<sup>a</sup>, Guodong Chen<sup>a</sup>, Li Zeng<sup>a</sup>, Guoqiang Wei<sup>a</sup>, Yanhua Xu<sup>\*a</sup>

**S1: Fitting result of material phonon cutoff frequency ( $\omega$ ) prediction**

**S2: The dielectric breakdown strength (Fb) prediction results of 760 ABO<sub>3</sub> perovskite oxide materials through the XGBoost machine learning model.**

**S1: Fitting result of material phonon cutoff frequency ( $\omega$ ) prediction**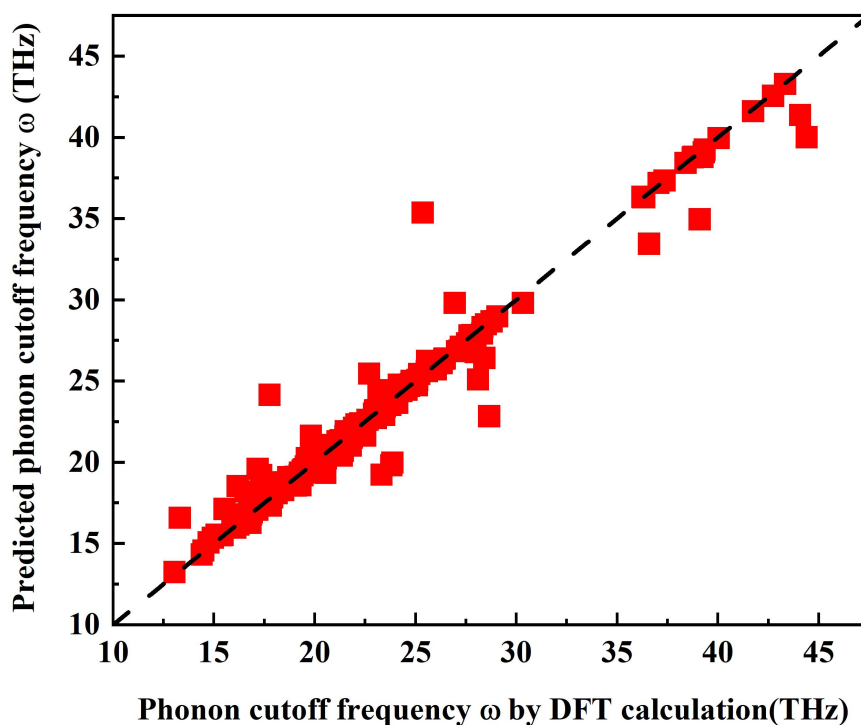

Figure 1. Fitting result of material phonon cutoff frequency prediction. Where the abscissa is the phonon cutoff frequency calculated by DFT, the ordinate is the phonon cutoff frequency predicted by the model, and the diagonal is the prediction calibration line. When all points are distributed near the diagonal, the model fits well.

It can be seen from Figure 1 that the predicted values of the models fit well with the target values. It shows that the XGBoost machine learning model can predict the phonon cutoff frequency of materials successfully.

## S2: The dielectric breakdown strength (Fb) prediction results of 760 ABO<sub>3</sub> perovskite oxide materials through the XGBoost machine learning model.

**Table S2:** The dielectric breakdown strength (Fb) prediction results of 760 ABO<sub>3</sub> perovskite oxide materials through the XGBoost machine learning model.

| Name   | Fb(MV/m) | Name   | Fb(MV/m) |
|--------|----------|--------|----------|
| LaB03  | 2784.29  | MgS03  | 783.56   |
| AlB03  | 2395.67  | ZnSi03 | 656.15   |
| LuB03  | 1498.91  | MnCO3  | 595.84   |
| YA103  | 1485.07  | ZnCO3  | 581.69   |
| DyAl03 | 1479.84  | YbTi03 | 581.69   |
| MgCO3  | 1478.82  | MgTi03 | 575.50   |
| CaCO3  | 1476.86  | LaAl03 | 575.50   |
| LuAl03 | 1476.25  | LaGa03 | 573.21   |
| HoB03  | 1470.04  | LaGa03 | 573.21   |
| SbB03  | 1293.17  | NiCO3  | 573.08   |
| BiB03  | 1284.21  | NaTa03 | 573.08   |
| MgSi03 | 1234.98  | MnCO3  | 573.08   |
| SrCO3  | 1213.96  | LiAs03 | 573.08   |
| PrAl03 | 1162.99  | ZrMn03 | 570.80   |
| LaAl03 | 1162.99  | LiNb03 | 570.80   |
| ScB03  | 1158.10  | KN03   | 547.59   |
| BaCO3  | 1158.10  | SrTe03 | 539.12   |
| NdAl03 | 1153.84  | MgSi03 | 538.38   |
| GaB03  | 1062.99  | CaGe03 | 535.03   |
| SrHf03 | 1041.52  | CsBr03 | 534.25   |
| NaNb03 | 1003.76  | MgSi03 | 527.58   |
| MgSi03 | 838.13   | YA103  | 525.57   |
| LiNb03 | 821.65   | TmAl03 | 525.57   |
| MgGe03 | 818.82   | TbAl03 | 525.57   |
| TlBr03 | 818.45   | LuAl03 | 525.57   |
| LiTa03 | 814.60   | LiP03  | 525.57   |
| KBr03  | 808.65   | HoAl03 | 525.57   |
| RbBr03 | 805.76   | ErAl03 | 525.57   |

|                    |        |                    |        |
|--------------------|--------|--------------------|--------|
| DyAlO <sub>3</sub> | 525.57 | NaSbO <sub>3</sub> | 387.85 |
| TiZnO <sub>3</sub> | 506.10 | InBO <sub>3</sub>  | 387.85 |
| PrAlO <sub>3</sub> | 506.10 | NaN <sub>3</sub>   | 387.13 |
| NaVO <sub>3</sub>  | 504.89 | CdCO <sub>3</sub>  | 387.13 |
| NdAlO <sub>3</sub> | 504.77 | ScBiO <sub>3</sub> | 377.36 |
| YBiO <sub>3</sub>  | 503.97 | ScBiO <sub>3</sub> | 377.36 |
| LiNbO <sub>3</sub> | 503.97 | MgSiO <sub>3</sub> | 371.87 |
| LaBiO <sub>3</sub> | 503.97 | CaTiO <sub>3</sub> | 369.52 |
| BaSiO <sub>3</sub> | 503.97 | MgSiO <sub>3</sub> | 367.17 |
| ZnSiO <sub>3</sub> | 502.91 | CoCO <sub>3</sub>  | 366.53 |
| RbNO <sub>3</sub>  | 502.65 | MgSiO <sub>3</sub> | 365.40 |
| LiNbO <sub>3</sub> | 502.65 | MgSiO <sub>3</sub> | 365.40 |
| NaN <sub>3</sub>   | 501.17 | YBiO <sub>3</sub>  | 365.33 |
| AlBiO <sub>3</sub> | 501.17 | HoBiO <sub>3</sub> | 365.33 |
| TiNiO <sub>3</sub> | 499.50 | MgSiO <sub>3</sub> | 364.43 |
| GaBiO <sub>3</sub> | 497.80 | CrBO <sub>3</sub>  | 360.23 |
| LiNO <sub>3</sub>  | 497.40 | FeSiO <sub>3</sub> | 359.86 |
| LiNbO <sub>3</sub> | 497.40 | RbTaO <sub>3</sub> | 359.62 |
| LiNbO <sub>3</sub> | 497.40 | MgSiO <sub>3</sub> | 357.31 |
| CaSnO <sub>3</sub> | 497.40 | MgSiO <sub>3</sub> | 357.31 |
| ZrMnO <sub>3</sub> | 496.69 | MgSiO <sub>3</sub> | 355.59 |
| TiCdO <sub>3</sub> | 496.69 | RbTaO <sub>3</sub> | 352.68 |
| KIO <sub>3</sub>   | 496.69 | TlSbO <sub>3</sub> | 349.62 |
| TiZnO <sub>3</sub> | 496.62 | CoCO <sub>3</sub>  | 349.07 |
| TiNiO <sub>3</sub> | 494.96 | SrGeO <sub>3</sub> | 341.01 |
| LiVO <sub>3</sub>  | 493.36 | MgSiO <sub>3</sub> | 338.22 |
| LiVO <sub>3</sub>  | 490.27 | NaPO <sub>3</sub>  | 336.80 |
| LiAsO <sub>3</sub> | 451.07 | MgSO <sub>3</sub>  | 336.71 |
| TaHO <sub>3</sub>  | 429.67 | LaAlO <sub>3</sub> | 335.39 |
| CaSiO <sub>3</sub> | 410.80 | CaCO <sub>3</sub>  | 334.55 |
| FeSiO <sub>3</sub> | 406.44 | ErLuO <sub>3</sub> | 330.09 |
| KSbO <sub>3</sub>  | 391.56 | RbNO <sub>3</sub>  | 326.80 |

|                    |         |                    |         |
|--------------------|---------|--------------------|---------|
| CaHfO <sub>3</sub> | 324. 41 | YScO <sub>3</sub>  | 305. 06 |
| SrHfO <sub>3</sub> | 323. 20 | YErO <sub>3</sub>  | 304. 83 |
| SrHfO <sub>3</sub> | 323. 20 | YbHfO <sub>3</sub> | 304. 39 |
| MgSiO <sub>3</sub> | 322. 82 | TbTmO <sub>3</sub> | 304. 39 |
| CaSiO <sub>3</sub> | 322. 82 | TbSmO <sub>3</sub> | 304. 39 |
| CaSiO <sub>3</sub> | 321. 98 | TbHoO <sub>3</sub> | 304. 39 |
| SmAlO <sub>3</sub> | 316. 19 | TbErO <sub>3</sub> | 304. 39 |
| MgSiO <sub>3</sub> | 316. 19 | SmTmO <sub>3</sub> | 304. 39 |
| LiNbO <sub>3</sub> | 315. 87 | SmHoO <sub>3</sub> | 304. 39 |
| TbLuO <sub>3</sub> | 315. 46 | SmErO <sub>3</sub> | 303. 84 |
| PrLuO <sub>3</sub> | 314. 86 | SmDyO <sub>3</sub> | 303. 11 |
| MgSiO <sub>3</sub> | 313. 76 | NaBrO <sub>3</sub> | 303. 11 |
| LaAlO <sub>3</sub> | 312. 44 | LaTmO <sub>3</sub> | 303. 11 |
| MgSiO <sub>3</sub> | 311. 87 | LaLuO <sub>3</sub> | 303. 11 |
| MgSiO <sub>3</sub> | 311. 28 | DyTmO <sub>3</sub> | 303. 11 |
| MgSiO <sub>3</sub> | 311. 28 | DyLuO <sub>3</sub> | 303. 11 |
| MgSiO <sub>3</sub> | 310. 77 | CaHfO <sub>3</sub> | 303. 11 |
| LuScO <sub>3</sub> | 310. 45 | NdScO <sub>3</sub> | 303. 11 |
| PrScO <sub>3</sub> | 305. 52 | ScGaO <sub>3</sub> | 303. 11 |
| LaSmO <sub>3</sub> | 305. 52 | MgSiO <sub>3</sub> | 303. 11 |
| YTmO <sub>3</sub>  | 305. 06 | CaSeO <sub>3</sub> | 303. 11 |
| SrHfO <sub>3</sub> | 324. 41 | SrHfO <sub>3</sub> | 303. 11 |
| DyAlO <sub>3</sub> | 323. 20 | SmYO <sub>3</sub>  | 303. 11 |
| TbScO <sub>3</sub> | 323. 20 | TiNiO <sub>3</sub> | 303. 11 |
| ScAlO <sub>3</sub> | 322. 82 | MgSeO <sub>3</sub> | 303. 11 |
| MgSiO <sub>3</sub> | 322. 82 | TmBiO <sub>3</sub> | 303. 11 |
| MgSiO <sub>3</sub> | 321. 98 | ScBiO <sub>3</sub> | 303. 11 |
| HoScO <sub>3</sub> | 316. 19 | LaHoO <sub>3</sub> | 303. 11 |
| HoLuO <sub>3</sub> | 316. 19 | ErBiO <sub>3</sub> | 299. 66 |
| DyScO <sub>3</sub> | 315. 87 | LaScO <sub>3</sub> | 298. 80 |
| LaAlO <sub>3</sub> | 315. 46 | SmScO <sub>3</sub> | 298. 80 |
| YTmO <sub>3</sub>  | 314. 86 | ZnSeO <sub>3</sub> | 298. 80 |

|                    |        |                    |        |
|--------------------|--------|--------------------|--------|
| SrHfO <sub>3</sub> | 290.95 | TiMnO <sub>3</sub> | 252.32 |
| LaYO <sub>3</sub>  | 290.64 | SrSiO <sub>3</sub> | 252.28 |
| LaHoO <sub>3</sub> | 290.64 | SrZrO <sub>3</sub> | 249.72 |
| LaErO <sub>3</sub> | 290.64 | TiMnO <sub>3</sub> | 249.10 |
| LaDyO <sub>3</sub> | 290.64 | TmGaO <sub>3</sub> | 246.17 |
| LaAlO <sub>3</sub> | 289.05 | HoGaO <sub>3</sub> | 246.17 |
| SrZrO <sub>3</sub> | 283.45 | ErBiO <sub>3</sub> | 245.67 |
| MgSiO <sub>3</sub> | 282.66 | LaAlO <sub>3</sub> | 239.14 |
| CaSiO <sub>3</sub> | 282.66 | LaScO <sub>3</sub> | 238.24 |
| TbGaO <sub>3</sub> | 281.97 | RbNbO <sub>3</sub> | 238.19 |
| LuGaO <sub>3</sub> | 281.97 | SrZrO <sub>3</sub> | 238.14 |
| LiIO <sub>3</sub>  | 281.97 | SrZrO <sub>3</sub> | 238.14 |
| LiIO <sub>3</sub>  | 281.97 | CaSiO <sub>3</sub> | 238.14 |
| DyGaO <sub>3</sub> | 281.97 | CaSiO <sub>3</sub> | 238.14 |
| LiIO <sub>3</sub>  | 281.47 | CaGeO <sub>3</sub> | 238.14 |
| CaSiO <sub>3</sub> | 280.79 | LaCrO <sub>3</sub> | 238.00 |
| CaSiO <sub>3</sub> | 279.66 | ZnSiO <sub>3</sub> | 237.57 |
| NaIO <sub>3</sub>  | 278.49 | YCrO <sub>3</sub>  | 236.33 |
| CaZrO <sub>3</sub> | 277.52 | BaZrO <sub>3</sub> | 235.91 |
| MgGeO <sub>3</sub> | 276.04 | TiCoO <sub>3</sub> | 235.44 |
| LiSbO <sub>3</sub> | 275.90 | CaZrO <sub>3</sub> | 235.10 |
| LiNbO <sub>3</sub> | 275.88 | YCrO <sub>3</sub>  | 234.84 |
| SrHfO <sub>3</sub> | 265.08 | BaThO <sub>3</sub> | 233.90 |
| CaSiO <sub>3</sub> | 264.30 | SmCrO <sub>3</sub> | 232.89 |
| SmGaO <sub>3</sub> | 263.12 | TiFeO <sub>3</sub> | 232.52 |
| TlIO <sub>3</sub>  | 263.00 | ZnSiO <sub>3</sub> | 232.04 |
| RbIO <sub>3</sub>  | 260.19 | ZnSeO <sub>3</sub> | 232.04 |
| BaHfO <sub>3</sub> | 259.52 | PrGaO <sub>3</sub> | 232.04 |
| TiNiO <sub>3</sub> | 259.23 | NdGaO <sub>3</sub> | 232.04 |
| KIO <sub>3</sub>   | 259.12 | LaGaO <sub>3</sub> | 232.04 |
| LaBiO <sub>3</sub> | 257.77 | GdGaO <sub>3</sub> | 232.04 |
| LiNbO <sub>3</sub> | 257.42 | ZnGeO <sub>3</sub> | 231.76 |

|                    |        |                    |        |
|--------------------|--------|--------------------|--------|
| TiFeO <sub>3</sub> | 231.76 | TiMnO <sub>3</sub> | 204.08 |
| TiFeO <sub>3</sub> | 231.39 | RbTaO <sub>3</sub> | 203.97 |
| TiFeO <sub>3</sub> | 231.39 | NaNbO <sub>3</sub> | 202.96 |
| CsNbO <sub>3</sub> | 231.11 | BaCeO <sub>3</sub> | 202.74 |
| SrZrO <sub>3</sub> | 231.06 | RbNbO <sub>3</sub> | 202.73 |
| CdSO <sub>3</sub>  | 231.06 | FeBiO <sub>3</sub> | 200.35 |
| CdSeO <sub>3</sub> | 231.06 | ZrPbO <sub>3</sub> | 200.13 |
| CaZrO <sub>3</sub> | 231.06 | KNbO <sub>3</sub>  | 199.13 |
| NdCrO <sub>3</sub> | 230.19 | TaAgO <sub>3</sub> | 197.85 |
| SrZrO <sub>3</sub> | 230.14 | FeBiO <sub>3</sub> | 197.85 |
| TiNiO <sub>3</sub> | 229.18 | LiTaO <sub>3</sub> | 197.53 |
| HfSnO <sub>3</sub> | 227.99 | MnSiO <sub>3</sub> | 195.78 |
| TmBiO <sub>3</sub> | 226.71 | CdSO <sub>3</sub>  | 195.57 |
| LaCrO <sub>3</sub> | 226.30 | NaAsO <sub>3</sub> | 195.18 |
| GdAlO <sub>3</sub> | 226.11 | AlBiO <sub>3</sub> | 195.06 |
| BaCeO <sub>3</sub> | 226.09 | MnSiO <sub>3</sub> | 194.78 |
| BaCeO <sub>3</sub> | 226.09 | SrZrO <sub>3</sub> | 193.02 |
| PrCrO <sub>3</sub> | 225.62 | MnSiO <sub>3</sub> | 193.02 |
| LiVO <sub>3</sub>  | 223.46 | FeBiO <sub>3</sub> | 191.91 |
| YbTiO <sub>3</sub> | 222.21 | HfPbO <sub>3</sub> | 191.32 |
| BaTiO <sub>3</sub> | 222.18 | HfMnO <sub>3</sub> | 190.56 |
| HfPbO <sub>3</sub> | 217.95 | FeSiO <sub>3</sub> | 190.56 |
| SrZrO <sub>3</sub> | 214.15 | CdSeO <sub>3</sub> | 190.56 |
| KTaO <sub>3</sub>  | 213.97 | AlGaO <sub>3</sub> | 190.56 |
| GdErO <sub>3</sub> | 213.65 | BaZrO <sub>3</sub> | 190.25 |
| NaTaO <sub>3</sub> | 212.90 | MgGeO <sub>3</sub> | 190.06 |
| LaCrO <sub>3</sub> | 211.47 | HfFeO <sub>3</sub> | 190.06 |
| BaTiO <sub>3</sub> | 210.72 | TbGdO <sub>3</sub> | 189.76 |
| MgGeO <sub>3</sub> | 208.29 | ZrPbO <sub>3</sub> | 189.38 |
| ZrPbO <sub>3</sub> | 207.25 | LiVO <sub>3</sub>  | 189.01 |
| KNbO <sub>3</sub>  | 206.89 | CaTeO <sub>3</sub> | 188.99 |
| MgMnO <sub>3</sub> | 204.41 | CaTiO <sub>3</sub> | 188.51 |

|                    |        |                    |        |
|--------------------|--------|--------------------|--------|
| LaGaO <sub>3</sub> | 188.07 | NbHfO <sub>3</sub> | 179.45 |
| GdScO <sub>3</sub> | 188.07 | MnSiO <sub>3</sub> | 179.45 |
| AlGaO <sub>3</sub> | 188.07 | KIO <sub>3</sub>   | 179.45 |
| CsIO <sub>3</sub>  | 187.76 | CdSiO <sub>3</sub> | 179.19 |
| LiNbO <sub>3</sub> | 187.50 | MgWO <sub>3</sub>  | 178.18 |
| HfO <sub>3</sub>   | 187.28 | SmCrO <sub>3</sub> | 177.34 |
| GdTmO <sub>3</sub> | 187.28 | YCrO <sub>3</sub>  | 174.70 |
| GdLuO <sub>3</sub> | 187.28 | YCrO <sub>3</sub>  | 174.70 |
| FeSiO <sub>3</sub> | 186.86 | TmCrO <sub>3</sub> | 174.70 |
| RbTaO <sub>3</sub> | 186.39 | TiZnO <sub>3</sub> | 174.70 |
| CdSiO <sub>3</sub> | 185.80 | TiCdO <sub>3</sub> | 174.70 |
| ScBiO <sub>3</sub> | 184.35 | TbCrO <sub>3</sub> | 174.70 |
| HoBiO <sub>3</sub> | 184.35 | ScCrO <sub>3</sub> | 174.70 |
| ZrPbO <sub>3</sub> | 182.75 | LuCrO <sub>3</sub> | 174.70 |
| NaTaO <sub>3</sub> | 182.68 | HoCrO <sub>3</sub> | 174.70 |
| YMoO <sub>3</sub>  | 181.77 | GdCrO <sub>3</sub> | 174.70 |
| TbInO <sub>3</sub> | 181.77 | ErInO <sub>3</sub> | 174.70 |
| NaTaO <sub>3</sub> | 181.77 | DyCrO <sub>3</sub> | 174.70 |
| MgTiO <sub>3</sub> | 181.77 | CaTiO <sub>3</sub> | 174.70 |
| HoInO <sub>3</sub> | 181.77 | HgSeO <sub>3</sub> | 173.72 |
| ErCrO <sub>3</sub> | 181.77 | TiPbO <sub>3</sub> | 173.68 |
| CoSiO <sub>3</sub> | 181.77 | TiMnO <sub>3</sub> | 173.39 |
| AlGaO <sub>3</sub> | 181.77 | NbHfO <sub>3</sub> | 172.47 |
| ZrPbO <sub>3</sub> | 180.75 | CaGeO <sub>3</sub> | 172.47 |
| SmInO <sub>3</sub> | 180.75 | TlSbO <sub>3</sub> | 170.36 |
| NdInO <sub>3</sub> | 180.75 | TiCdO <sub>3</sub> | 170.36 |
| LaInO <sub>3</sub> | 180.75 | NdCrO <sub>3</sub> | 170.36 |
| InBiO <sub>3</sub> | 180.75 | NaTaO <sub>3</sub> | 170.36 |
| HfPbO <sub>3</sub> | 180.75 | NaNbO <sub>3</sub> | 170.36 |
| HfPbO <sub>3</sub> | 180.75 | MgSiO <sub>3</sub> | 170.36 |
| LuBiO <sub>3</sub> | 180.35 | CrBiO <sub>3</sub> | 170.36 |
| HfCoO <sub>3</sub> | 180.20 | TmBO <sub>3</sub>  | 169.65 |



|                    |        |                    |        |
|--------------------|--------|--------------------|--------|
| NaNbO <sub>3</sub> | 169.65 | AlVO <sub>3</sub>  | 152.23 |
| NaNbO <sub>3</sub> | 169.65 | BaCeO <sub>3</sub> | 151.37 |
| AcCrO <sub>3</sub> | 169.54 | CaTiO <sub>3</sub> | 151.28 |
| InBiO <sub>3</sub> | 169.40 | BaMnO <sub>3</sub> | 151.25 |
| AgIO <sub>3</sub>  | 169.40 | SrCeO <sub>3</sub> | 150.81 |
| SrTiO <sub>3</sub> | 168.97 | LaCrO <sub>3</sub> | 150.81 |
| CrFeO <sub>3</sub> | 168.12 | BaTiO <sub>3</sub> | 150.81 |
| FeBO <sub>3</sub>  | 167.85 | VH <sub>3</sub>    | 150.73 |
| SiSnO <sub>3</sub> | 167.84 | VH <sub>3</sub>    | 150.73 |
| MnGeO <sub>3</sub> | 167.83 | AlFeO <sub>3</sub> | 149.55 |
| CrBiO <sub>3</sub> | 167.83 | CoTeO <sub>3</sub> | 149.39 |
| SnPbO <sub>3</sub> | 165.13 | AlFeO <sub>3</sub> | 147.58 |
| TiNiO <sub>3</sub> | 162.99 | TiCdO <sub>3</sub> | 147.05 |
| MnGeO <sub>3</sub> | 162.99 | GaFeO <sub>3</sub> | 147.05 |
| NiSnO <sub>3</sub> | 162.72 | CaGeO <sub>3</sub> | 146.82 |
| FeBiO <sub>3</sub> | 161.62 | YBiO <sub>3</sub>  | 146.69 |
| VB <sub>3</sub>    | 161.27 | BaSiO <sub>3</sub> | 146.69 |
| BaTiO <sub>3</sub> | 160.25 | NaTaO <sub>3</sub> | 146.53 |
| CaWO <sub>3</sub>  | 159.81 | LiSbO <sub>3</sub> | 145.45 |
| CaTiO <sub>3</sub> | 159.50 | AlFeO <sub>3</sub> | 145.45 |
| YbTiO <sub>3</sub> | 157.78 | VCrO <sub>3</sub>  | 145.42 |
| NdCrO <sub>3</sub> | 157.78 | ZnGeO <sub>3</sub> | 145.39 |
| CoTeO <sub>3</sub> | 157.78 | MgTiO <sub>3</sub> | 144.81 |
| CaSnO <sub>3</sub> | 156.89 | MgSnO <sub>3</sub> | 142.98 |
| CaCeO <sub>3</sub> | 156.89 | AgIO <sub>3</sub>  | 142.63 |
| GaFeO <sub>3</sub> | 156.63 | CoGeO <sub>3</sub> | 142.48 |
| HfFeO <sub>3</sub> | 155.03 | MgSiO <sub>3</sub> | 141.42 |
| BaMnO <sub>3</sub> | 154.98 | ZnSnO <sub>3</sub> | 140.93 |
| VH <sub>3</sub>    | 154.82 | TiPbO <sub>3</sub> | 140.73 |
| ZnWO <sub>3</sub>  | 153.85 | VSiO <sub>3</sub>  | 140.01 |
| GdB <sub>3</sub>   | 152.60 | KNbO <sub>3</sub>  | 139.80 |
| TlSbO <sub>3</sub> | 152.23 | TiFeO <sub>3</sub> | 139.52 |

|                    |        |                    |        |
|--------------------|--------|--------------------|--------|
| NaSbO <sub>3</sub> | 139.52 | AlMoO <sub>3</sub> | 128.55 |
| FeBiO <sub>3</sub> | 139.52 | TmVO <sub>3</sub>  | 128.35 |
| NaSbO <sub>3</sub> | 139.17 | LuVO <sub>3</sub>  | 127.71 |
| MnNiO <sub>3</sub> | 139.06 | SrTiO <sub>3</sub> | 127.65 |
| ZnSnO <sub>3</sub> | 138.83 | AlFeO <sub>3</sub> | 127.60 |
| TiHgO <sub>3</sub> | 138.83 | ZrCoO <sub>3</sub> | 127.55 |
| CaSnO <sub>3</sub> | 138.83 | SiPbO <sub>3</sub> | 127.43 |
| AlBiO <sub>3</sub> | 137.97 | CsNbO <sub>3</sub> | 126.79 |
| MnZnO <sub>3</sub> | 137.68 | AlVO <sub>3</sub>  | 126.45 |
| LaFeO <sub>3</sub> | 137.45 | YFeO <sub>3</sub>  | 126.20 |
| CdGeO <sub>3</sub> | 137.45 | TmFeO <sub>3</sub> | 126.20 |
| MnCoO <sub>3</sub> | 137.26 | TbFeO <sub>3</sub> | 126.20 |
| ZnSnO <sub>3</sub> | 137.03 | SrTiO <sub>3</sub> | 126.20 |
| TiSnO <sub>3</sub> | 137.03 | SrSnO <sub>3</sub> | 126.20 |
| SrMoO <sub>3</sub> | 137.03 | SmFeO <sub>3</sub> | 126.20 |
| SbHO <sub>3</sub>  | 137.03 | NdFeO <sub>3</sub> | 126.20 |
| NaBiO <sub>3</sub> | 137.03 | NbAgO <sub>3</sub> | 126.20 |
| MnSnO <sub>3</sub> | 137.03 | NaNbO <sub>3</sub> | 126.20 |
| KSbO <sub>3</sub>  | 137.03 | LuFeO <sub>3</sub> | 126.20 |
| CrBiO <sub>3</sub> | 136.67 | LaFeO <sub>3</sub> | 126.20 |
| MnAlO <sub>3</sub> | 136.27 | KSbO <sub>3</sub>  | 126.20 |
| KNbO <sub>3</sub>  | 136.08 | HoFeO <sub>3</sub> | 126.20 |
| GaBiO <sub>3</sub> | 134.64 | GdFeO <sub>3</sub> | 126.20 |
| NbAgO <sub>3</sub> | 132.55 | ErVO <sub>3</sub>  | 126.20 |
| TiFeO <sub>3</sub> | 131.97 | ErFeO <sub>3</sub> | 126.20 |
| NaSbO <sub>3</sub> | 130.18 | DyFeO <sub>3</sub> | 126.20 |
| SrSnO <sub>3</sub> | 129.70 | BaTiO <sub>3</sub> | 126.20 |
| SrTiO <sub>3</sub> | 129.52 | AlCrO <sub>3</sub> | 126.20 |
| BaTiO <sub>3</sub> | 129.52 | MgWO <sub>3</sub>  | 126.10 |
| RbNbO <sub>3</sub> | 128.94 | YFeO <sub>3</sub>  | 125.49 |
| NaNbO <sub>3</sub> | 128.69 | VPbO <sub>3</sub>  | 124.07 |
| GaBiO <sub>3</sub> | 128.69 | VPbO <sub>3</sub>  | 123.79 |

|                    |        |                    |        |
|--------------------|--------|--------------------|--------|
| TaTiO <sub>3</sub> | 123.08 | CoBO <sub>3</sub>  | 110.25 |
| MnSnO <sub>3</sub> | 123.08 | MgMoO <sub>3</sub> | 110.22 |
| CdSnO <sub>3</sub> | 123.08 | AlVO <sub>3</sub>  | 110.19 |
| BaMnO <sub>3</sub> | 123.08 | YSbO <sub>3</sub>  | 108.62 |
| BaMnO <sub>3</sub> | 123.08 | NaSbO <sub>3</sub> | 108.62 |
| TiSnO <sub>3</sub> | 122.58 | MnGeO <sub>3</sub> | 108.62 |
| FeGeO <sub>3</sub> | 122.16 | LiSbO <sub>3</sub> | 108.62 |
| CdGeO <sub>3</sub> | 122.16 | InCoO <sub>3</sub> | 108.62 |
| MgGeO <sub>3</sub> | 121.12 | CaMoO <sub>3</sub> | 108.62 |
| VCrO <sub>3</sub>  | 121.01 | CaMoO <sub>3</sub> | 108.49 |
| VCrO <sub>3</sub>  | 121.01 | BaSiO <sub>3</sub> | 108.34 |
| VCrO <sub>3</sub>  | 121.01 | ZnMoO <sub>3</sub> | 108.21 |
| VCrO <sub>3</sub>  | 121.01 | YVO <sub>3</sub>   | 108.21 |
| AlCoO <sub>3</sub> | 120.82 | YVO <sub>3</sub>   | 108.21 |
| FeBiO <sub>3</sub> | 120.64 | YFeO <sub>3</sub>  | 108.21 |
| VCrO <sub>3</sub>  | 119.81 | TiMnO <sub>3</sub> | 108.21 |
| CoSnO <sub>3</sub> | 118.69 | TiFeO <sub>3</sub> | 108.21 |
| CoGeO <sub>3</sub> | 117.39 | TbVO <sub>3</sub>  | 108.21 |
| CaNiO <sub>3</sub> | 115.27 | ScFeO <sub>3</sub> | 108.21 |
| ScVO <sub>3</sub>  | 115.20 | PrFeO <sub>3</sub> | 108.21 |
| BaNiO <sub>3</sub> | 113.50 | NdFeO <sub>3</sub> | 108.21 |
| BaNiO <sub>3</sub> | 113.50 | NaNbO <sub>3</sub> | 108.21 |
| VCrO <sub>3</sub>  | 113.42 | LuCoO <sub>3</sub> | 108.21 |
| CaPtO <sub>3</sub> | 113.04 | LaVO <sub>3</sub>  | 108.21 |
| VGaO <sub>3</sub>  | 112.44 | LaFeO <sub>3</sub> | 108.21 |
| TaCuO <sub>3</sub> | 112.10 | HoVO <sub>3</sub>  | 108.21 |
| CdGeO <sub>3</sub> | 111.63 | HfCrO <sub>3</sub> | 108.21 |
| VCrO <sub>3</sub>  | 111.34 | GdVO <sub>3</sub>  | 108.21 |
| SrSnO <sub>3</sub> | 111.21 | FeBiO <sub>3</sub> | 108.21 |
| LaMnO <sub>3</sub> | 111.19 | ErCoO <sub>3</sub> | 108.21 |
| CaMoO <sub>3</sub> | 110.76 | DyVO <sub>3</sub>  | 108.21 |
| VBiO <sub>3</sub>  | 110.47 | CrBiO <sub>3</sub> | 108.21 |

|                    |        |                    |       |
|--------------------|--------|--------------------|-------|
| AcFeO <sub>3</sub> | 108.17 | FeBiO <sub>3</sub> | 82.54 |
| TbCoO <sub>3</sub> | 107.55 | MgZrO <sub>3</sub> | 81.80 |
| CrInO <sub>3</sub> | 107.55 | MnBiO <sub>3</sub> | 81.53 |
| VZnO <sub>3</sub>  | 107.21 | VCdO <sub>3</sub>  | 81.31 |
| AlCoO <sub>3</sub> | 106.81 | TlFeO <sub>3</sub> | 81.31 |
| YbGeO <sub>3</sub> | 106.12 | SrPbO <sub>3</sub> | 81.31 |
| SrSnO <sub>3</sub> | 105.23 | SrMnO <sub>3</sub> | 81.31 |
| NaNbO <sub>3</sub> | 105.01 | SrCrO <sub>3</sub> | 81.31 |
| VCuO <sub>3</sub>  | 104.99 | SmRhO <sub>3</sub> | 81.31 |
| NiBiO <sub>3</sub> | 104.99 | NbAgO <sub>3</sub> | 81.31 |
| NbCuO <sub>3</sub> | 99.64  | LuTlO <sub>3</sub> | 81.31 |
| TiVO <sub>3</sub>  | 98.79  | CeFeO <sub>3</sub> | 81.31 |
| LaMnO <sub>3</sub> | 97.72  | CdSnO <sub>3</sub> | 81.31 |
| ScTlO <sub>3</sub> | 97.59  | CdGeO <sub>3</sub> | 81.31 |
| TbRhO <sub>3</sub> | 95.96  | BaMnO <sub>3</sub> | 81.31 |
| SrMnO <sub>3</sub> | 95.96  | BaMnO <sub>3</sub> | 81.31 |
| SmTlO <sub>3</sub> | 95.96  | BaMnO <sub>3</sub> | 81.31 |
| MgVO <sub>3</sub>  | 95.96  | BaMnO <sub>3</sub> | 81.31 |
| CoSnO <sub>3</sub> | 95.96  | AlTlO <sub>3</sub> | 81.31 |
| CeNiO <sub>3</sub> | 95.96  | CdSiO <sub>3</sub> | 81.18 |
| CaPbO <sub>3</sub> | 95.96  | SmCoO <sub>3</sub> | 80.88 |
| NdVO <sub>3</sub>  | 95.46  | VH <sub>3</sub>    | 80.10 |
| MgSnO <sub>3</sub> | 93.49  | FeBO <sub>3</sub>  | 79.62 |
| AlCoO <sub>3</sub> | 92.52  | CaVO <sub>3</sub>  | 78.73 |
| SmFeO <sub>3</sub> | 89.66  | MnFeO <sub>3</sub> | 78.63 |
| LaFeO <sub>3</sub> | 88.96  | EuHfO <sub>3</sub> | 77.61 |
| SrCrO <sub>3</sub> | 84.24  | SrCrO <sub>3</sub> | 77.42 |
| NbTlO <sub>3</sub> | 83.78  | PrRhO <sub>3</sub> | 76.51 |
| MnAlO <sub>3</sub> | 83.74  | NdRhO <sub>3</sub> | 76.51 |
| TaTlO <sub>3</sub> | 83.58  | LaRhO <sub>3</sub> | 76.51 |
| ScBiO <sub>3</sub> | 83.58  | ErMnO <sub>3</sub> | 76.51 |
| HfMgO <sub>3</sub> | 83.58  | CaCrO <sub>3</sub> | 76.51 |

|                    |       |                    |       |
|--------------------|-------|--------------------|-------|
| CaCrO <sub>3</sub> | 76.51 | NiBiO <sub>3</sub> | 53.20 |
| CaGeO <sub>3</sub> | 76.18 | CaWO <sub>3</sub>  | 52.79 |
| AlNiO <sub>3</sub> | 75.73 | BaPbO <sub>3</sub> | 52.77 |
| KBiO <sub>3</sub>  | 74.97 | AgSbO <sub>3</sub> | 52.77 |
| TbMnO <sub>3</sub> | 72.95 | CuSiO <sub>3</sub> | 52.70 |
| MgMnO <sub>3</sub> | 72.95 | ZnCoO <sub>3</sub> | 52.49 |
| KBiO <sub>3</sub>  | 72.95 | BaPbO <sub>3</sub> | 52.38 |
| HoMnO <sub>3</sub> | 72.95 | KVO <sub>3</sub>   | 52.06 |
| CaVO <sub>3</sub>  | 72.95 | AlCuO <sub>3</sub> | 51.86 |
| CaMnO <sub>3</sub> | 72.95 | YbVO <sub>3</sub>  | 51.35 |
| CaMnO <sub>3</sub> | 72.95 | NaUO <sub>3</sub>  | 51.35 |
| AgAsO <sub>3</sub> | 72.95 | CuSeO <sub>3</sub> | 51.35 |
| LiUO <sub>3</sub>  | 69.86 | CaNiO <sub>3</sub> | 51.35 |
| TaTiO <sub>3</sub> | 65.98 | BaTcO <sub>3</sub> | 51.35 |
| MnSnO <sub>3</sub> | 60.12 | GePbO <sub>3</sub> | 50.97 |
| LaCoO <sub>3</sub> | 57.48 | SrVO <sub>3</sub>  | 50.55 |
| LiUO <sub>3</sub>  | 57.30 | RbVO <sub>3</sub>  | 50.41 |
| RbUO <sub>3</sub>  | 56.15 | CrPbO <sub>3</sub> | 50.41 |
| CsUO <sub>3</sub>  | 56.15 | YVO <sub>3</sub>   | 50.37 |
| NaWO <sub>3</sub>  | 55.90 | GdCoO <sub>3</sub> | 48.70 |
| LaMnO <sub>3</sub> | 55.90 | NaVO <sub>3</sub>  | 48.29 |
| KUO <sub>3</sub>   | 55.82 | AgSbO <sub>3</sub> | 47.42 |
| DyMnO <sub>3</sub> | 54.18 | KBiO <sub>3</sub>  | 47.22 |
| UTiO <sub>3</sub>  | 53.78 | MnBiO <sub>3</sub> | 46.06 |
| BaSnO <sub>3</sub> | 53.72 | TlGaO <sub>3</sub> | 45.94 |
| YMnO <sub>3</sub>  | 53.61 | LaMnO <sub>3</sub> | 45.94 |
| TmMnO <sub>3</sub> | 53.61 | HoCoO <sub>3</sub> | 45.94 |
| TiCrO <sub>3</sub> | 53.61 | EuZrO <sub>3</sub> | 45.51 |
| SmMnO <sub>3</sub> | 53.61 | YbBO <sub>3</sub>  | 41.97 |
| NaUO <sub>3</sub>  | 53.61 | LaMnO <sub>3</sub> | 41.97 |
| CuGeO <sub>3</sub> | 53.61 | LaMnO <sub>3</sub> | 41.97 |
| BiRhO <sub>3</sub> | 53.61 | AgSbO <sub>3</sub> | 41.97 |

|                    |       |                    |       |
|--------------------|-------|--------------------|-------|
| NdCoO <sub>3</sub> | 41.82 | LaCoO <sub>3</sub> | 32.02 |
| CeGaO <sub>3</sub> | 40.85 | YCoO <sub>3</sub>  | 31.97 |
| MgCoO <sub>3</sub> | 40.44 | TmCoO <sub>3</sub> | 31.97 |
| SmVO <sub>3</sub>  | 40.38 | SmNiO <sub>3</sub> | 31.97 |
| MnPbO <sub>3</sub> | 40.38 | PrCoO <sub>3</sub> | 31.97 |
| LaCoO <sub>3</sub> | 39.23 | NdNiO <sub>3</sub> | 31.97 |
| CeSbO <sub>3</sub> | 39.17 | NdMnO <sub>3</sub> | 31.97 |
| NbTiO <sub>3</sub> | 39.15 | LuMnO <sub>3</sub> | 31.97 |
| CdGeO <sub>3</sub> | 38.64 | GdNiO <sub>3</sub> | 31.97 |
| LiBiO <sub>3</sub> | 38.63 | EuFeO <sub>3</sub> | 31.97 |
| CdCoO <sub>3</sub> | 37.94 | DyCoO <sub>3</sub> | 31.97 |
| SrCoO <sub>3</sub> | 37.28 | CuTeO <sub>3</sub> | 31.97 |
| YNiO <sub>3</sub>  | 36.86 | CeVO <sub>3</sub>  | 31.97 |
| LuNiO <sub>3</sub> | 36.63 | SrMoO <sub>3</sub> | 31.27 |
| CeGaO <sub>3</sub> | 36.34 | NdVO <sub>3</sub>  | 31.12 |
| FeCO <sub>3</sub>  | 36.34 | CeVO <sub>3</sub>  | 31.12 |
| YMnO <sub>3</sub>  | 36.24 | MnPbO <sub>3</sub> | 31.08 |
| SmCuO <sub>3</sub> | 36.24 | MnSiO <sub>3</sub> | 31.01 |
| PrMnO <sub>3</sub> | 36.24 | LaVO <sub>3</sub>  | 30.88 |
| MnZnO <sub>3</sub> | 36.24 | BaPbO <sub>3</sub> | 30.58 |
| DyMnO <sub>3</sub> | 36.24 | CeCrO <sub>3</sub> | 30.20 |
| EuTiO <sub>3</sub> | 35.86 | YNiO <sub>3</sub>  | 29.75 |
| PrCoO <sub>3</sub> | 35.27 | SmCoO <sub>3</sub> | 29.75 |
| TiCdO <sub>3</sub> | 34.96 | PrNiO <sub>3</sub> | 29.75 |
| InBiO <sub>3</sub> | 34.37 | NdVO <sub>3</sub>  | 29.75 |
| VGeO <sub>3</sub>  | 33.83 | NdCoO <sub>3</sub> | 29.75 |
| SrCrO <sub>3</sub> | 33.82 | GdTiO <sub>3</sub> | 29.75 |
| YCuO <sub>3</sub>  | 32.58 | DyNiO <sub>3</sub> | 29.75 |
| ZnCrO <sub>3</sub> | 32.52 | BaCrO <sub>3</sub> | 29.75 |
| TmNiO <sub>3</sub> | 32.35 | YbBO <sub>3</sub>  | 27.60 |
| ErNiO <sub>3</sub> | 32.31 | BaPuO <sub>3</sub> | 27.60 |
| MnBiO <sub>3</sub> | 32.06 | EuAlO <sub>3</sub> | 26.79 |
